# Supplementary material
Source: MDPI journal article supplement (https://www.mdpi.com/2504-3900/8/1/26)

**THE EFFECTS OF A  
NITRATE-RICH,  
BEETROOT JUICE  
ON COGNITION,  
MOOD AND  
CARDIOVASCULAR  
RESPONSES IN  
YOUNGER AND  
OLDER ADULTS**

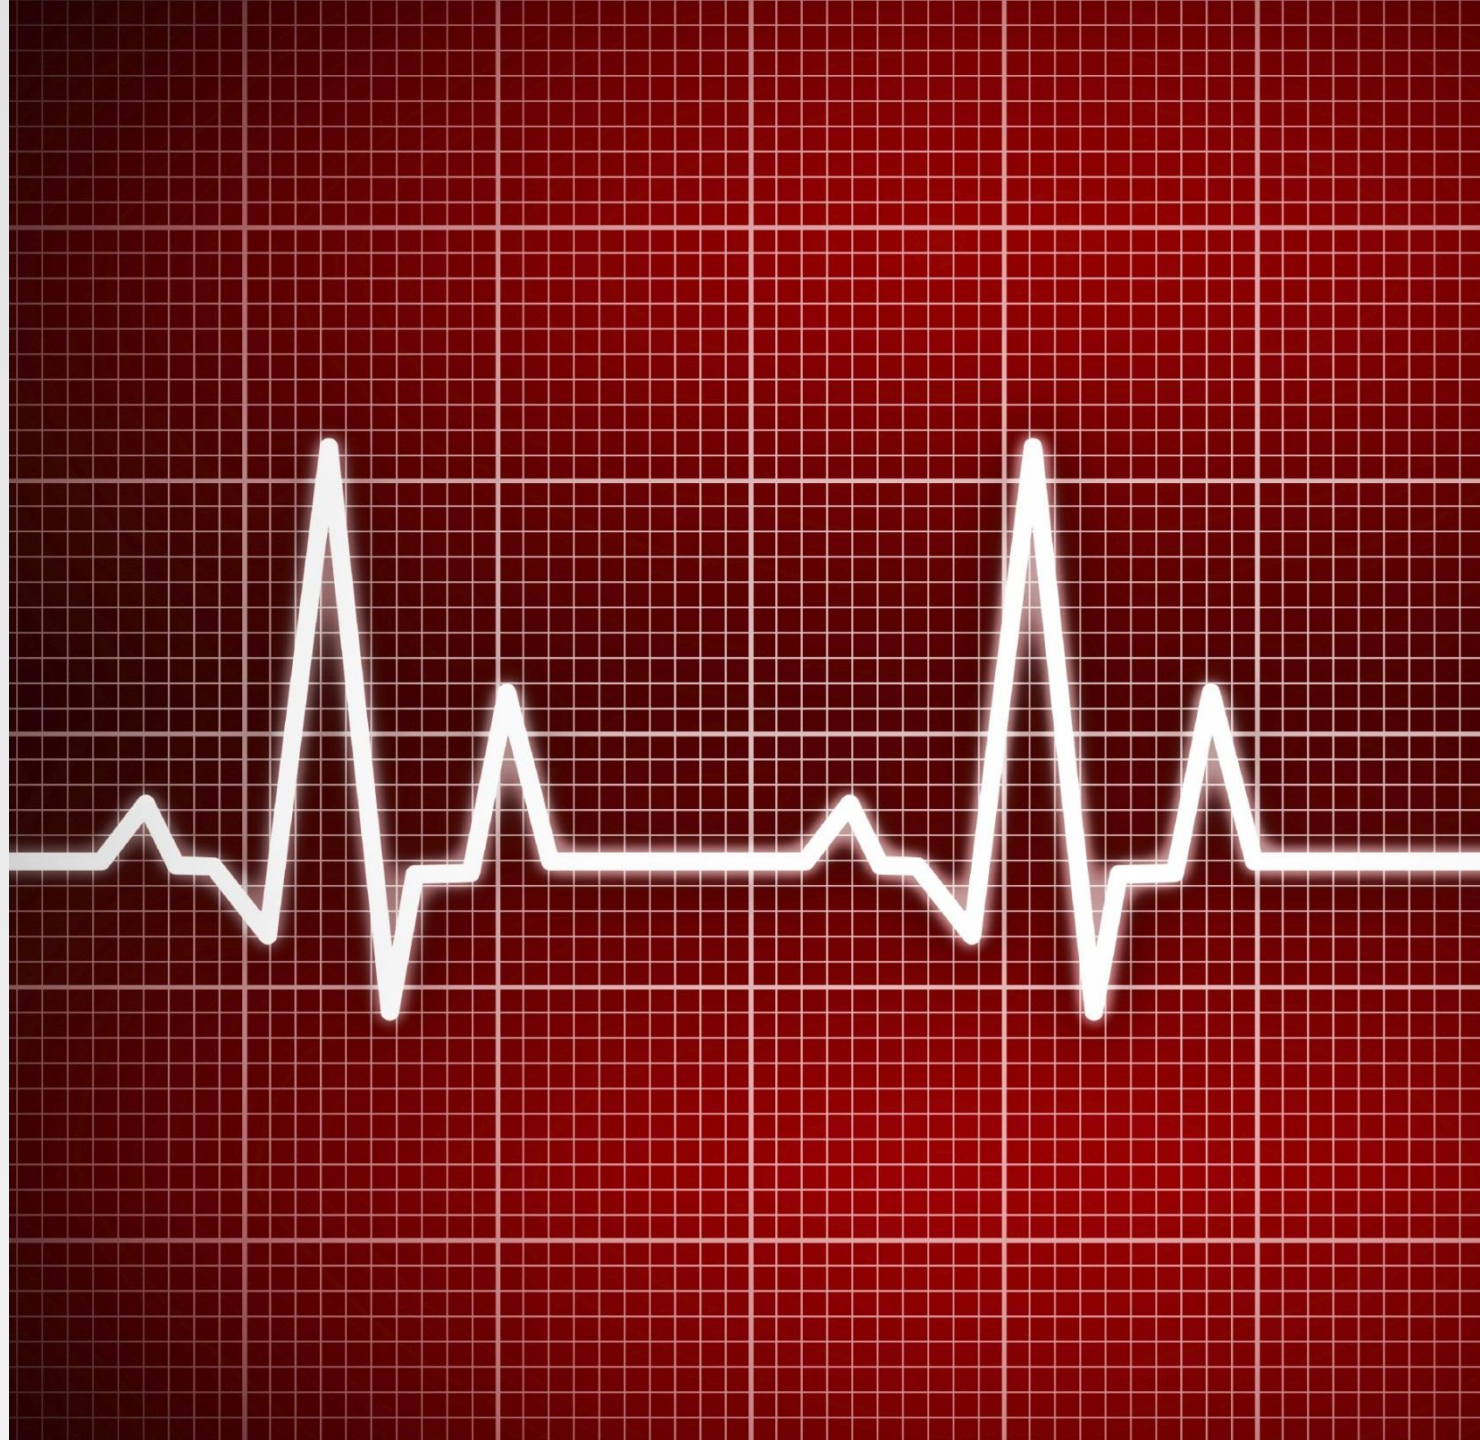

# Background

- There has been a large increase in disease and age-related dysfunction over the past few decades
- Beetroot juice (BR) consumption has many benefits including:
  - Reduced blood pressure
  - Increased time to fatigue and improved exercise performance
  - Improved blood flow to the brain and cognitive performance
- Older adults have an age-related decrease in NO production leading to a reduction in endothelial function
- Few studies comparing younger versus older adults

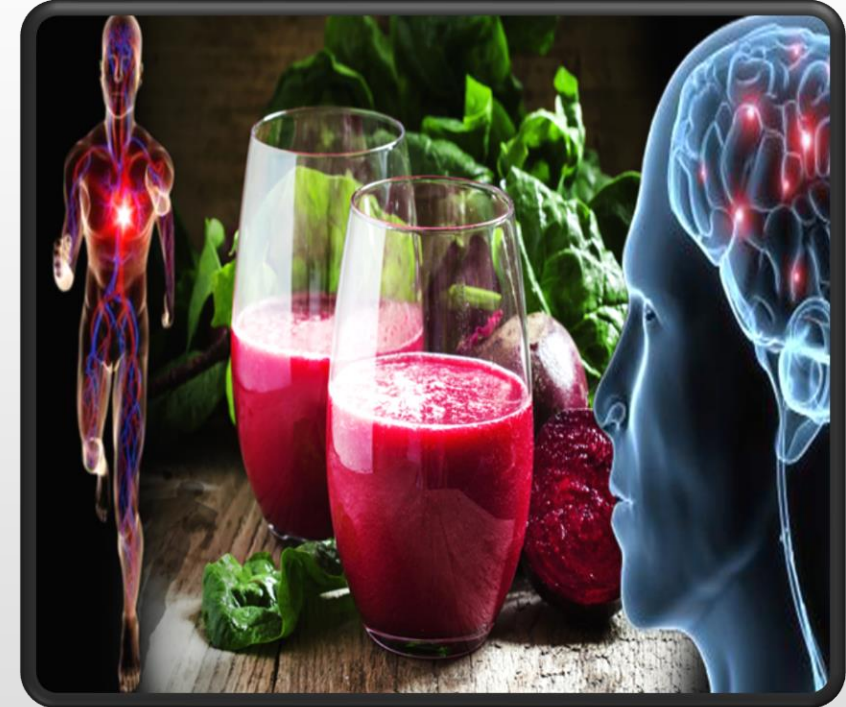

# Background - NO

- There are currently two main pathways known for NO production in the human body
  - Exogenous pathway
  - Endogenous pathway
- BR leads to greater production of NO via the exogenous pathway
- NO has many functions in the human body

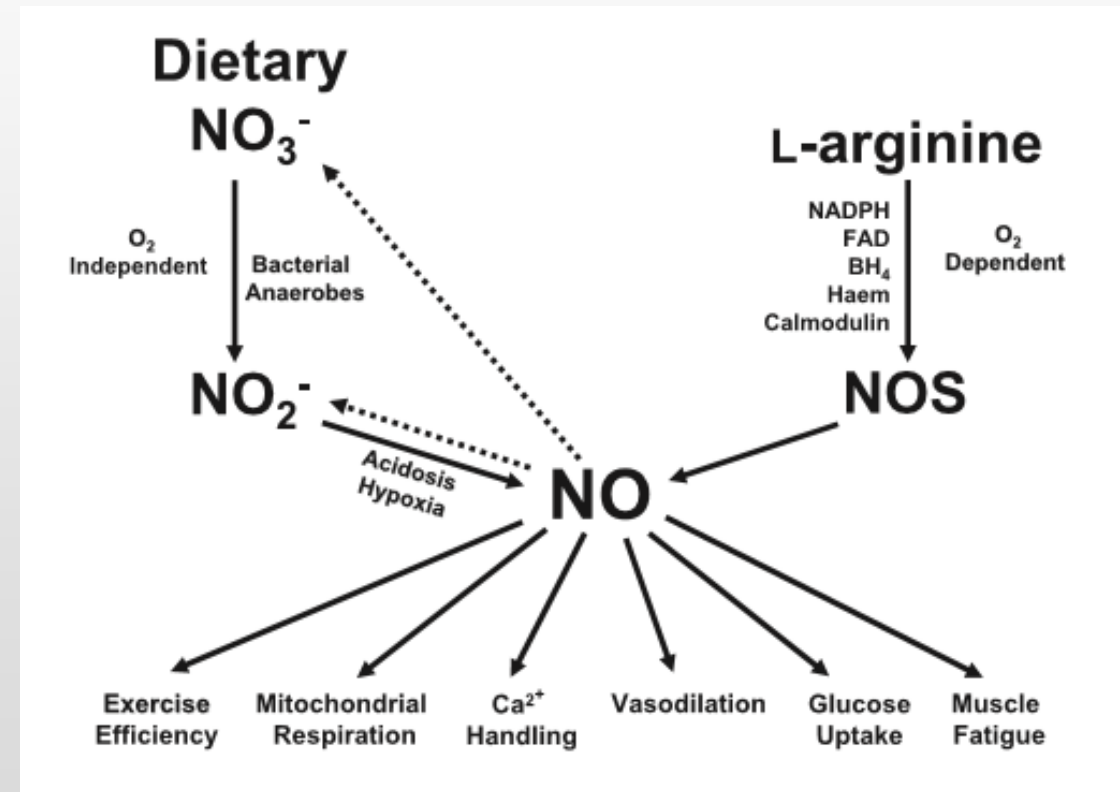

# Aims

- To examine the effects of acute supplementation with  $\text{NO}_3^-$  rich beetroot juice on:
  1. cardiovascular responses, cognition, and mood and perception
  2. compare these effects between younger and older adults



# Method

- Randomised, double-blind, crossover design
- N = 24 (13 younger adults, 11 older adults)
- Beverages 150 ml of:
  - BR (651 mg  $\text{NO}_3^-$ )
  - PL (dilution of the BR with added concentrate, 65.8 mg  $\text{NO}_3^-$ )
- Measures:
  - plasma  $[\text{NO}_3^-]$  and  $[\text{NO}_2^-]$
  - blood pressure
  - heart rate
  - $\text{VO}_2$  kinetics
  - cognitive performance
  - mood and perception

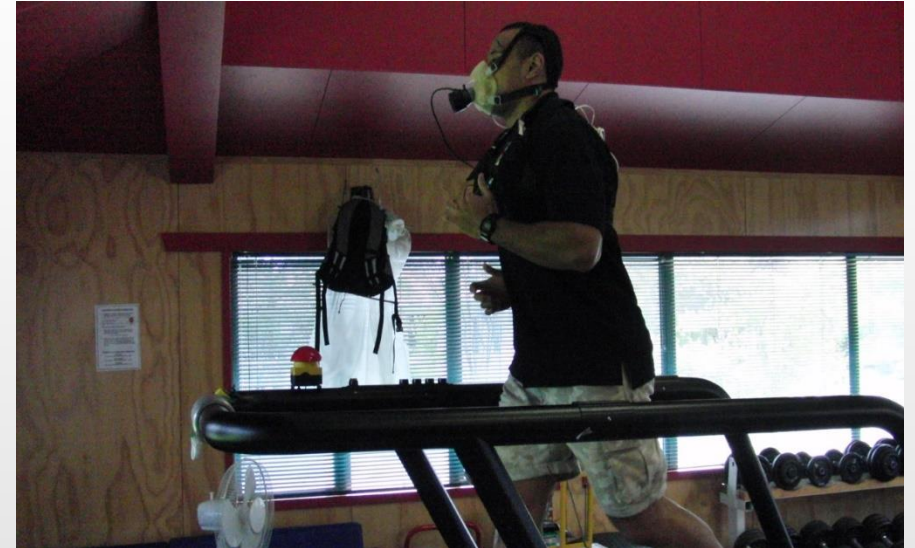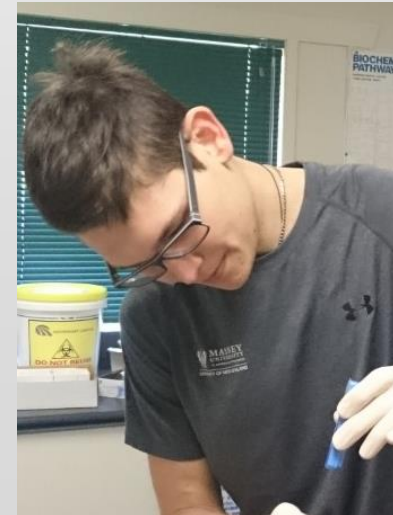

# Method – Cont.

- Cognitive tests:
  - Choice reaction test (CRT)
  - Rapid visual information processing test (RVIP)
  - Stroop test
  
- Mood and Perceptual tests:
  - Profile of Mood States (POMS)
  - Feeling scale (FS)
  - Felt arousal scale (FAS)
  - Rating of perceived exertion (RPE)

## FEELING SCALE

+5 Very good  
 +4  
 +3 Good  
 +2  
 +1 Fairly good  
 0 Neutral  
 -1 Fairly bad  
 -2  
 -3 Bad  
 -4  
 -5 Very bad

## FELT AROUSAL SCALE (FAS) (Svebak & Murgatroyd, 1985)

Estimate here how aroused you actually feel. Do this by circling the appropriate number. By "arousal" we meant how "worked-up" you feel. You might experience high arousal in one of a variety of ways, for example as excitement or anxiety or anger. Low arousal might also be experienced by you in one of a number of different ways, for example as relaxation or boredom or calmness.

1 LOW AROUSAL

2

3

4

5

6 HIGH AROUSAL

## Profile of Mood States-Short Form (POMS-40)

Refer to the definitions below. Consider how you are feeling right now, when circling the appropriate response. Please make sure you have responded to all items.

| FATIGUE   | Not at all | A little | Moderately | Quite a bit | Extremely |
|-----------|------------|----------|------------|-------------|-----------|
|           |            |          |            |             |           |
| Worn out  | 0          | 1        | 2          | 3           | 4         |
| Weary     | 0          | 1        | 2          | 3           | 4         |
| Bushed    | 0          | 1        | 2          | 3           | 4         |
| Fatigued  | 0          | 1        | 2          | 3           | 4         |
| Exhausted | 0          | 1        | 2          | 3           | 4         |

# Study Protocol

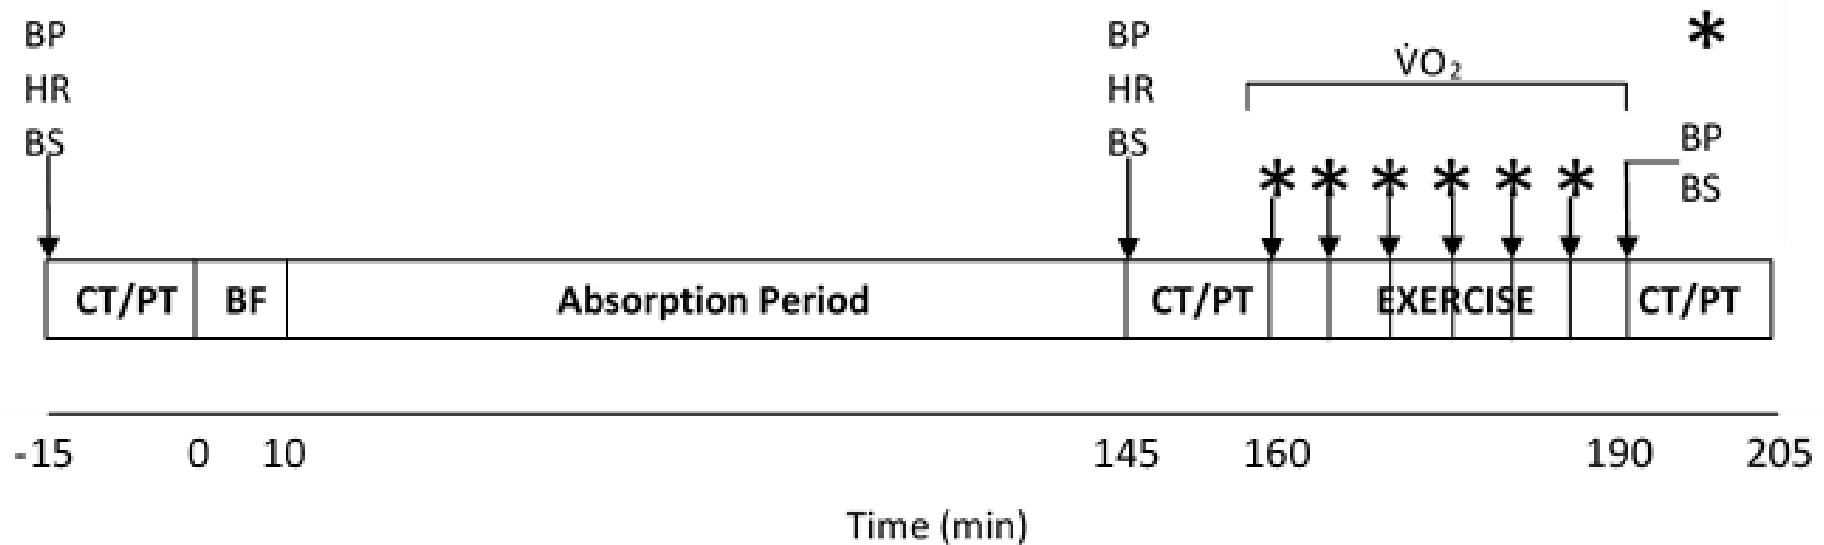

**Figure 3.1.** Schematic of the study protocol.

CT, cognitive tests; PT, perceptual tests; BF, breakfast; BP, blood pressure; BS, blood sample; HR, heart rate;  $\dot{V}O_2$ , oxygen uptake

\* indicates measurements of HR, RPE (rating of perceived exertion), FS (feeling scale), and FAS (felt arousal scale).

# Results – Plasma $[\text{NO}_3^-]$ and $[\text{NO}_2^-]$

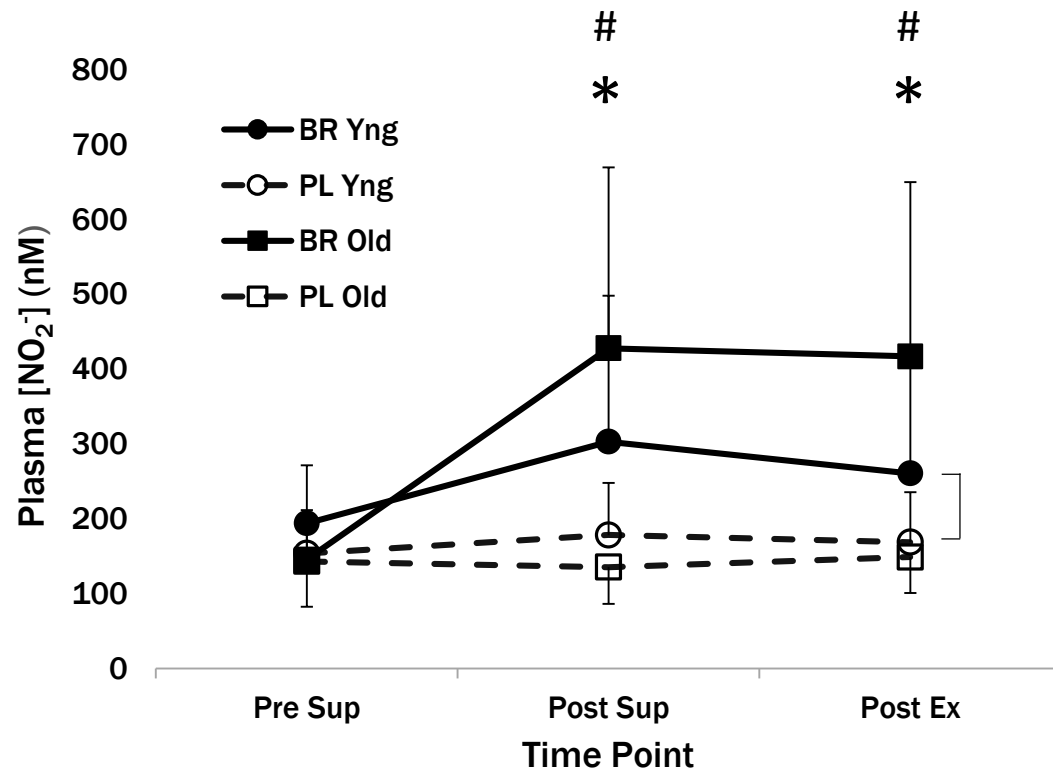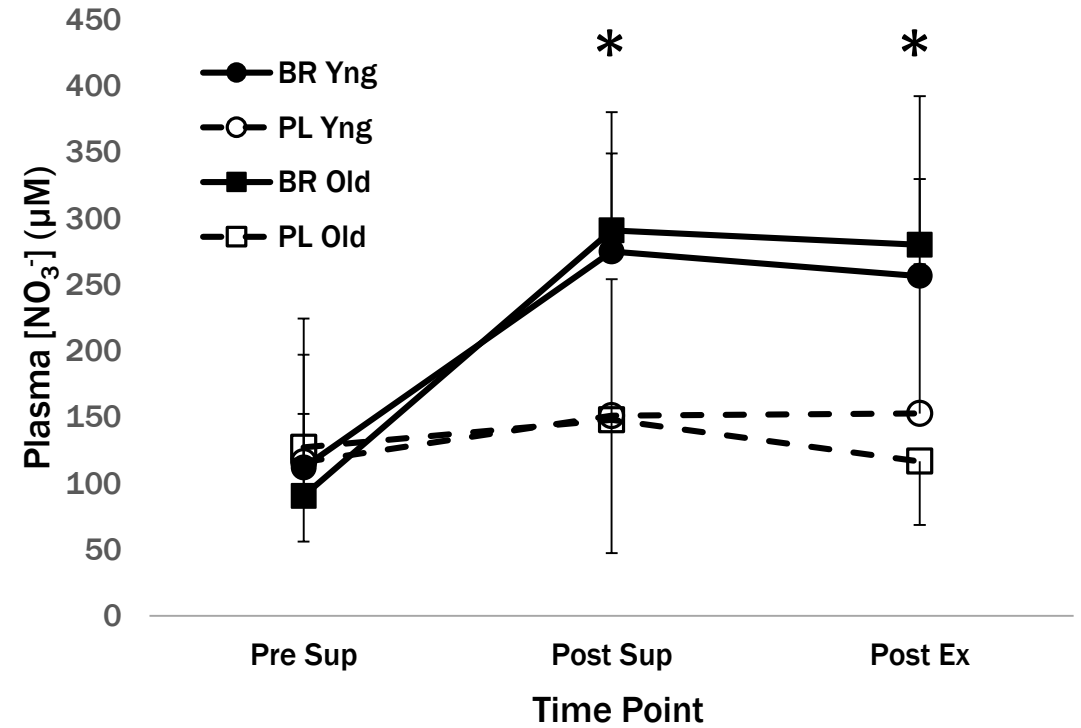



# Results – Blood Pressure

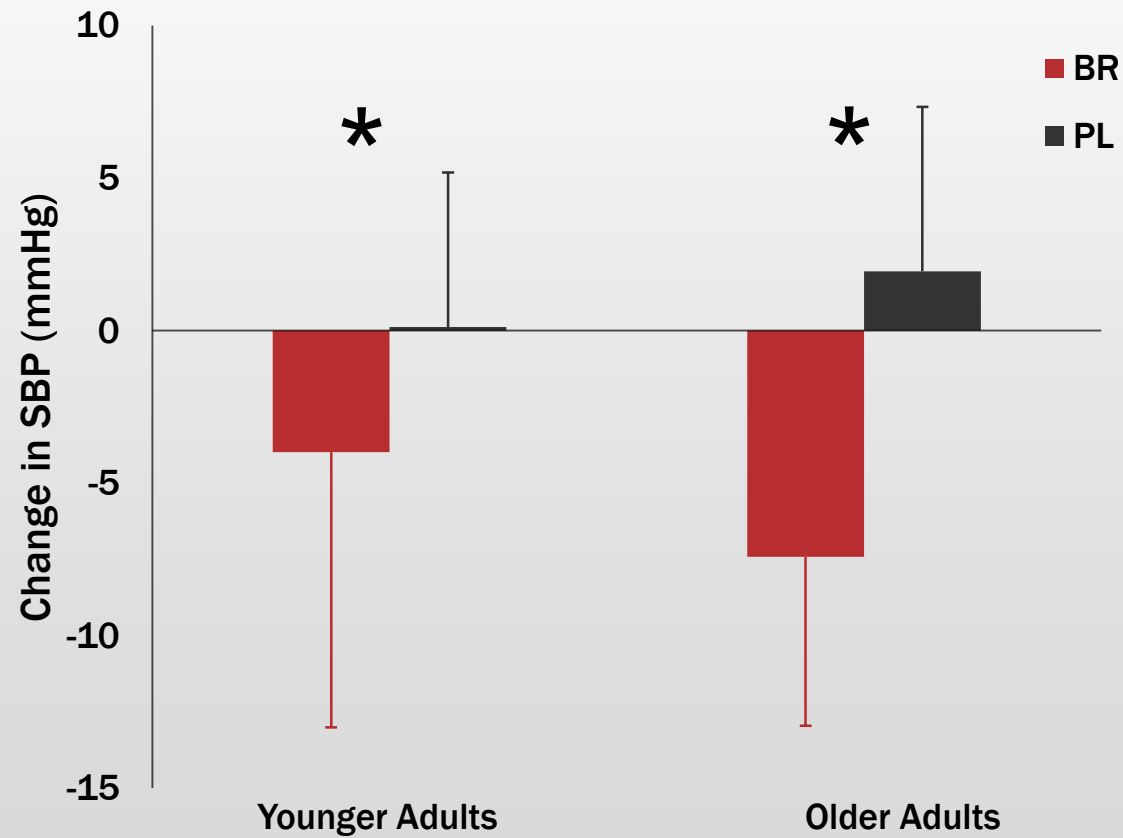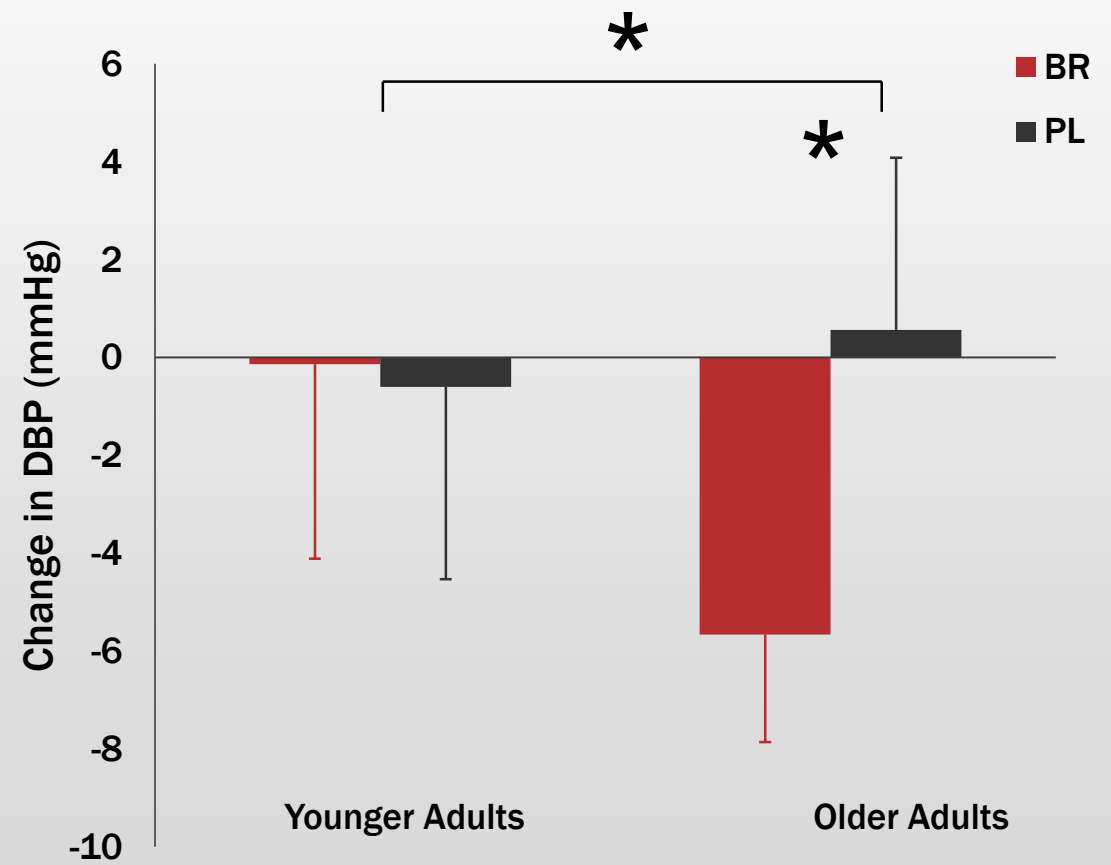

# Results – Oxygen Uptake Kinetics

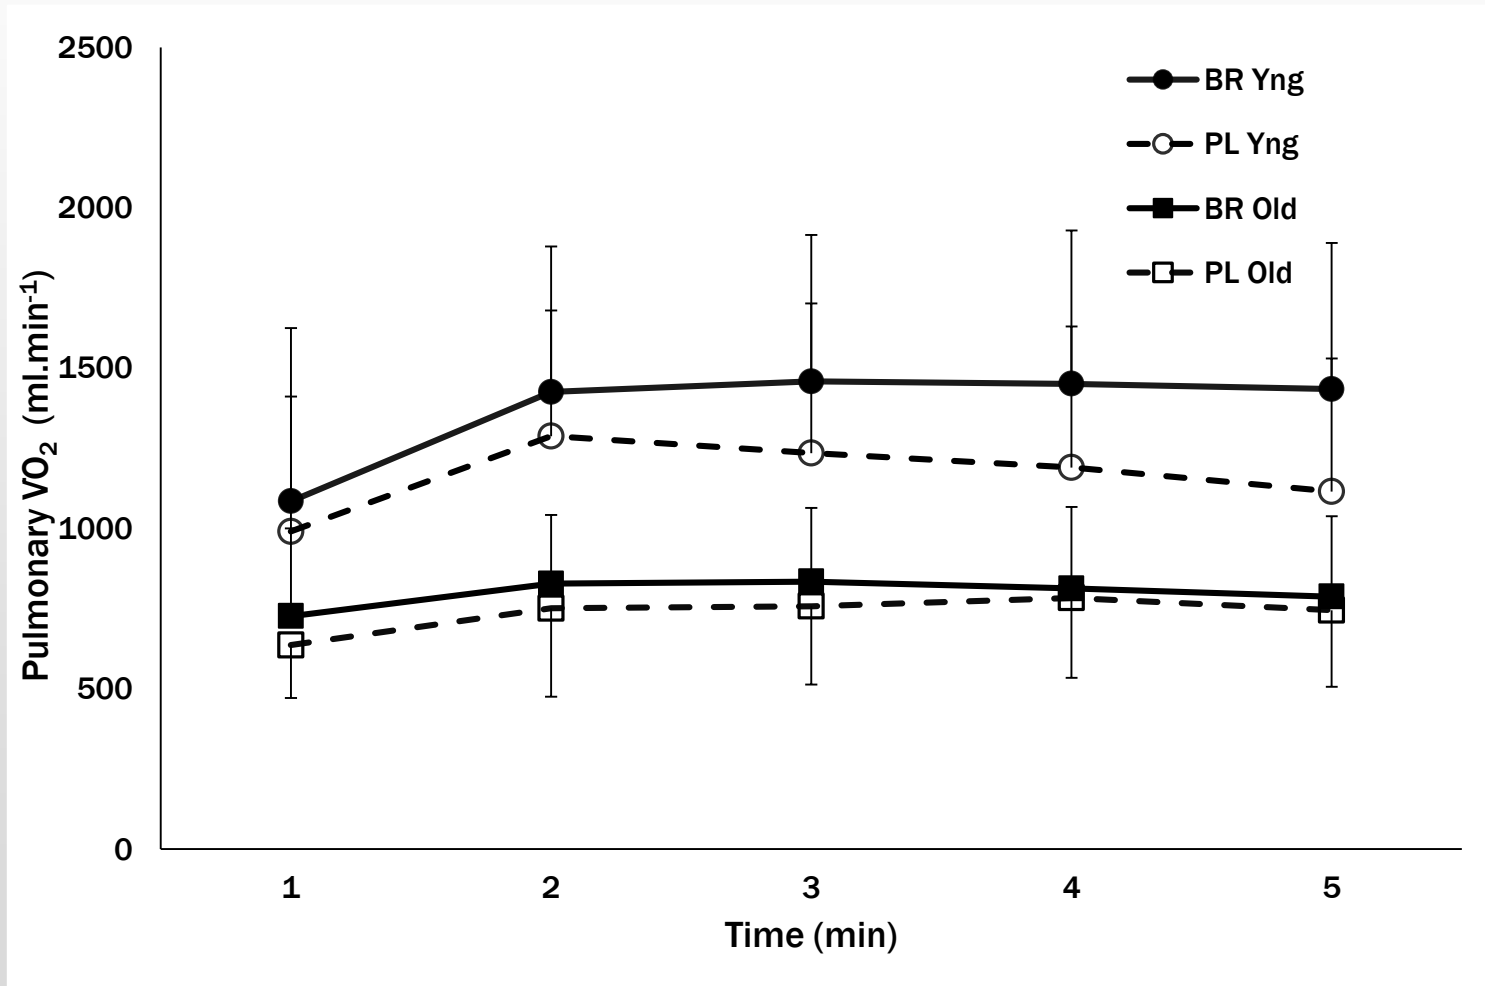

# Results – Cognitive Performance

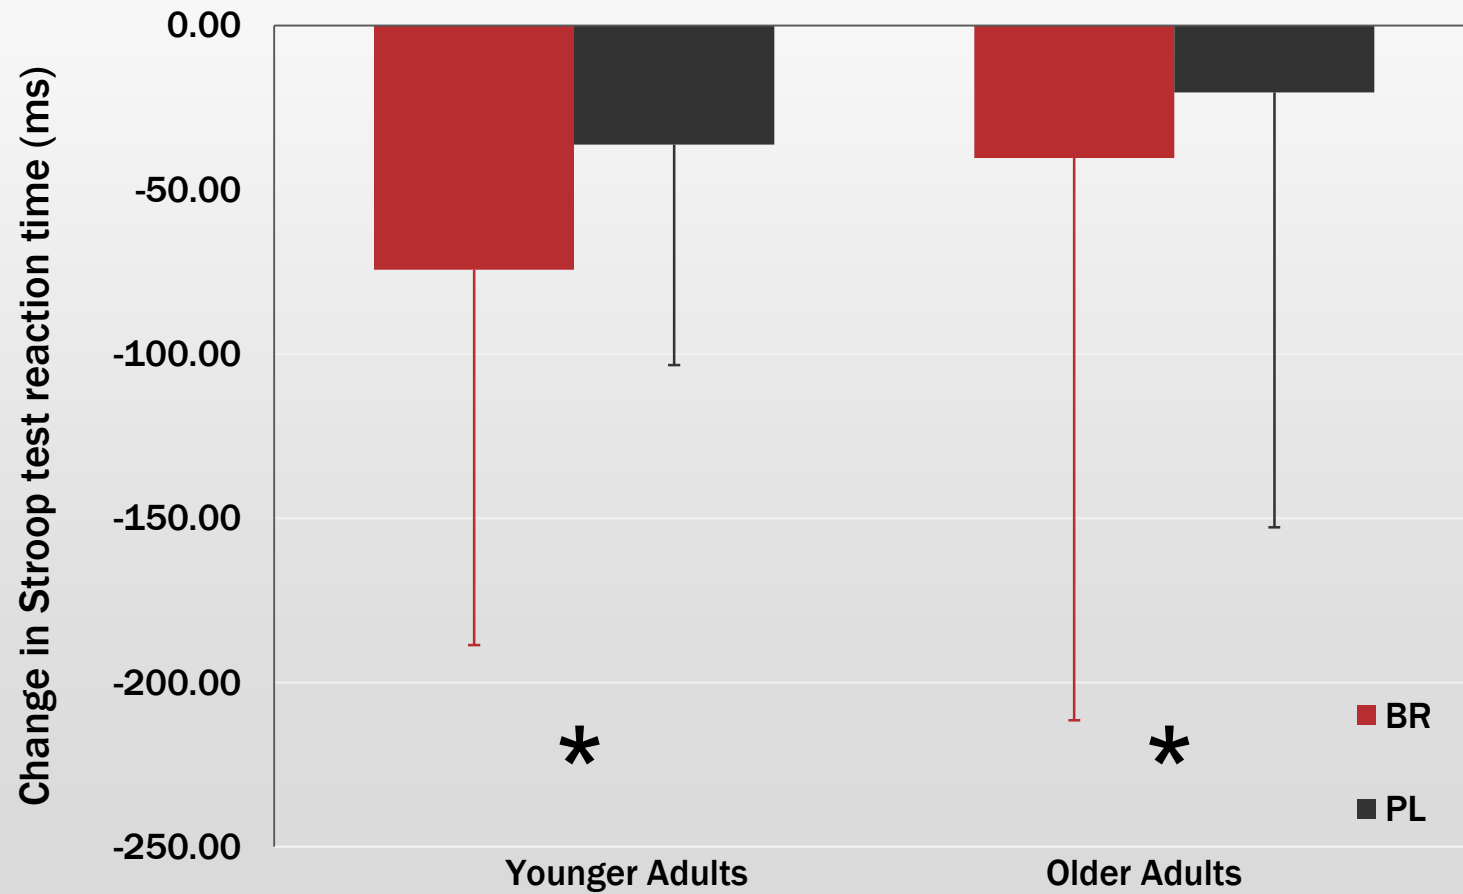

# Conclusions

- Acute supplementation with  $\text{NO}_3^-$  rich BR increased plasma  $[\text{NO}_2^-]$  and  $[\text{NO}_3^-]$  and reduced SBP and DBP
- The increase in plasma  $[\text{NO}_2^-]$  was greater in older compared to younger adults
- The reduction in DBP was greater in older adults compared to younger adults
- BR supplementation improved cognitive performance in the Stroop test

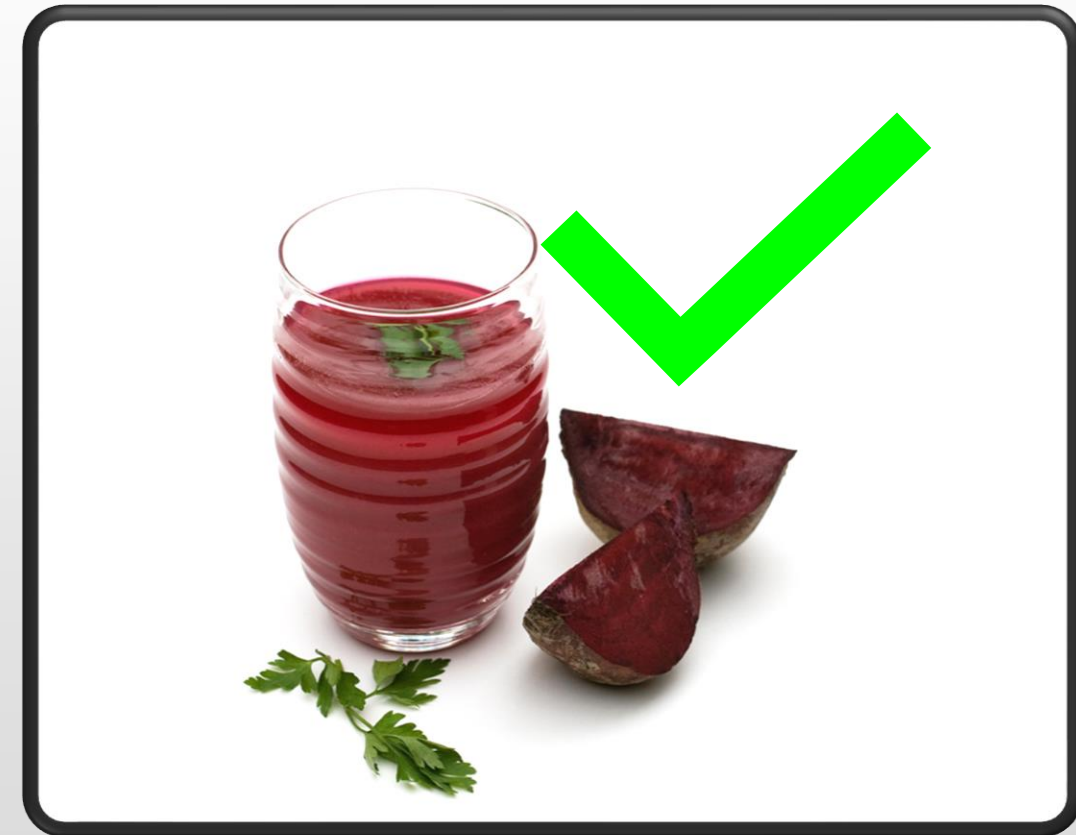

# Acknowledgements

## Supervisors:

- Associate Professor Ajmol Ali
- Associate Professor Kay Rutherford-Markwick
- Associate Professor Rachel Page

## Beetroot juice production:

- Associate Professor Marie Wong
- Dr Wannita Jirangrat
- Dr Kenneth Teh
- PC Tong
- Dr Claire Badenhorst

## Help in the lab:

- Kyle Southward
- Dr Wendy O'Brien

**Thank you**

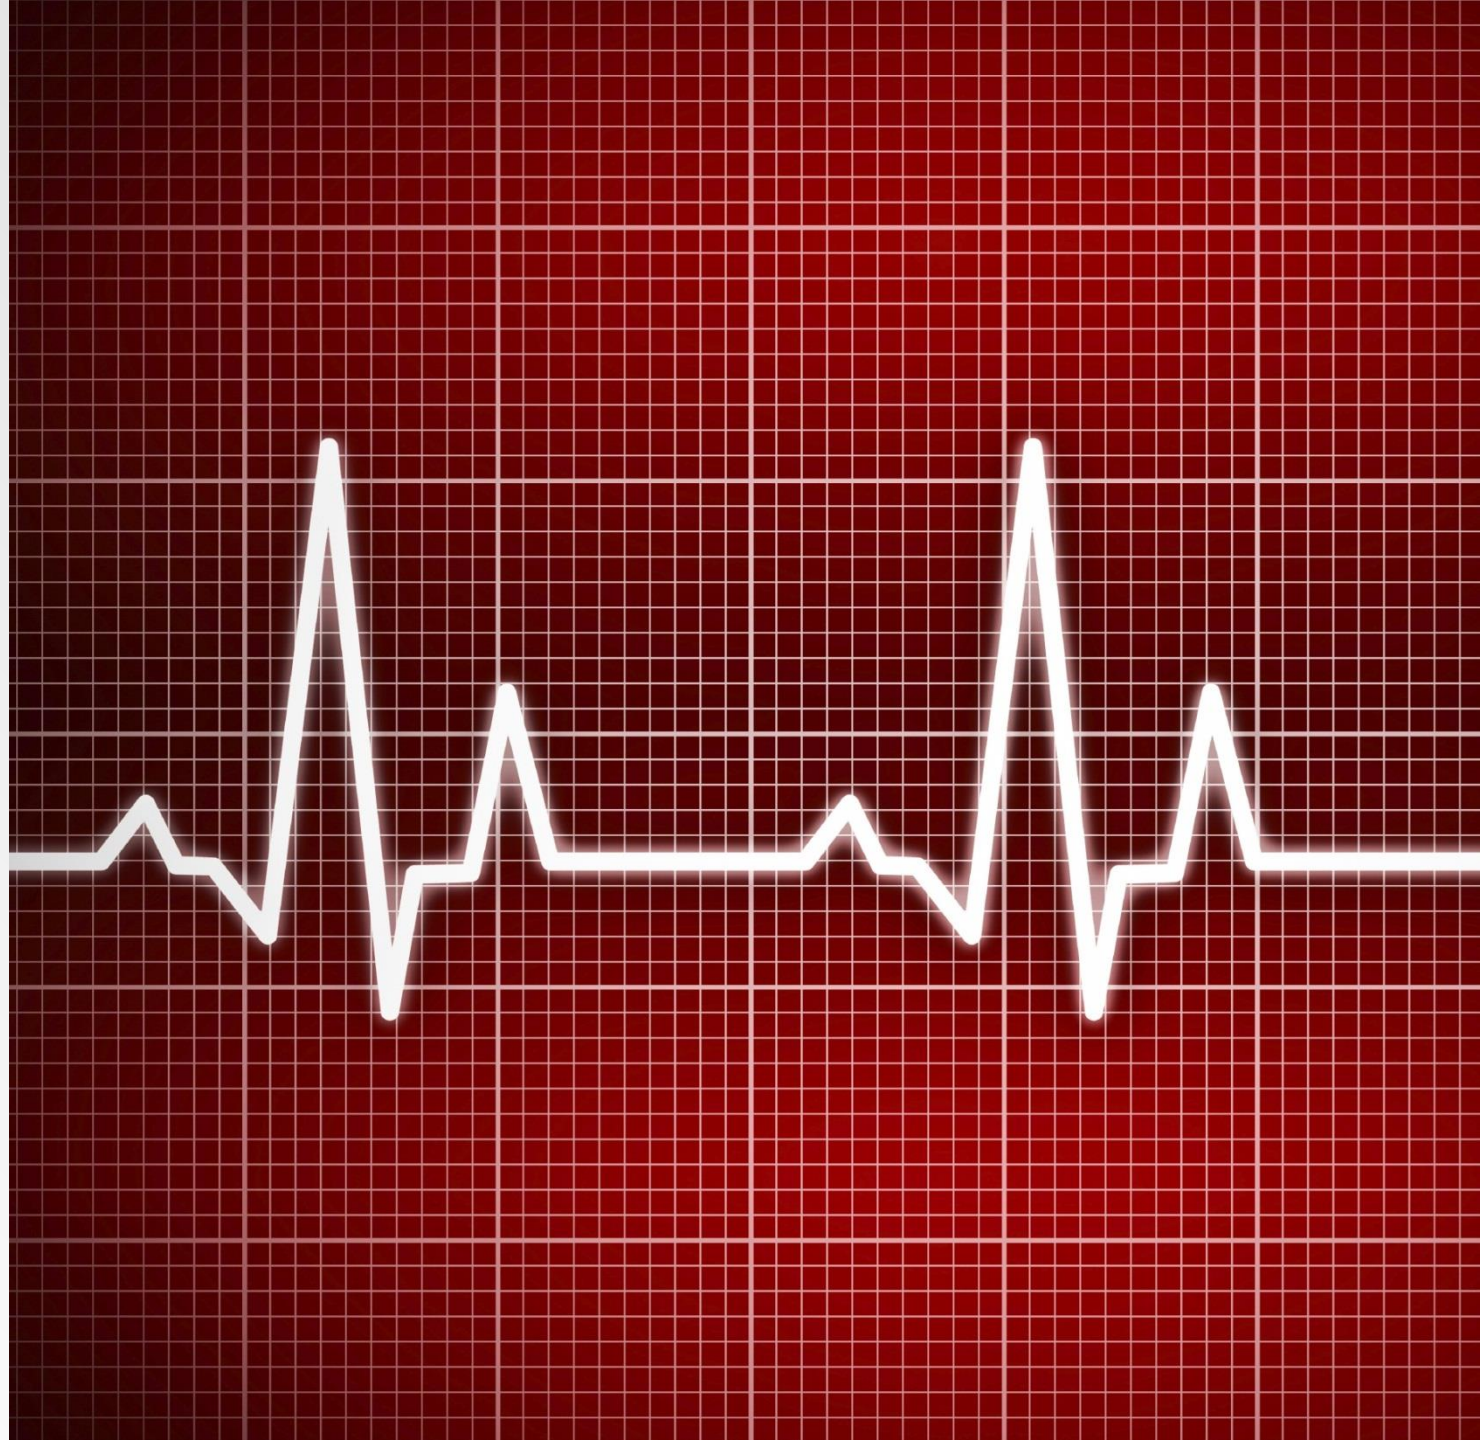

Supplement: s1 [file s1]
